# Supplementary material for: Upadacitinib therapy in refractory inflammatory myositis: a case series of 10 patients
Source: PubMed Central journal article supplement — RMD Open. 2024 Jan 19;10(1):e003837. doi: 10.1136/rmdopen-2023-003837 (PMC10806474; doi:10.1136/rmdopen-2023-003837), 2024-01-19
Supplement: rmdopen-2023-003837supp001.pdf [file rmdopen-2023-003837supp001.pdf]

**Supplemental Table 1: Patient baseline characteristics and current status**

|                                                | <b>All subjects (n = 10)</b> |
|------------------------------------------------|------------------------------|
| <i>Age (years), mean (SD)</i>                  |                              |
| <i>At diagnosis</i>                            | 52.5 (19.6)                  |
| <i>Current age or at time of death</i>         | 56.5 (18.9)                  |
| <i>Female, n (%)</i>                           | 8 (80.0%)                    |
| <i>Years of disease, mean (SD)</i>             | 3.9 (3.21)                   |
| <i>Expert classification, n (%)</i>            |                              |
| <i>Classic DM</i>                              | 5 (50.0%)                    |
| <i>Amyopathic DM</i>                           | 3 (30.0%)                    |
| <i>Anti-synthetase syndrome</i>                | 2 (20.0%)                    |
| <i>Autoantibodies identified, n</i>            |                              |
| <i>Anti-Jo1</i>                                | 1                            |
| <i>Anti-PL12</i>                               | 1                            |
| <i>Anti-SAE1</i>                               | 1                            |
| <i>Anti-MDA5</i>                               | 4                            |
| <i>Anti-TIF-1</i>                              | 1                            |
| <i>Anti-Ro52</i>                               | 6                            |
| <i>Negative MSA and MAA</i>                    | 1                            |
| <i>Myositis antibody panel not done</i>        | 1                            |
| <i>Systems involved, n (%)</i>                 |                              |
| <i>Muscular</i>                                | 6 (60.0%)                    |
| <i>Pulmonary</i>                               | 5 (50.0%)                    |
| <i>Articular</i>                               | 5 (50.0%)                    |
| <i>Cutaneous</i>                               | 7 (70.0%)                    |
| <i>Previous therapies, mean (SD)</i>           | 3.90 (1.91)                  |
| <i>Rituximab, n (%)</i>                        | 1 (10.0%)                    |
| <i>IVIg, n (%)</i>                             | 4 (40.0%)                    |
| <i>Mycophenolate, n (%)</i>                    | 7 (70.0%)                    |
| <i>Azathioprine, n (%)</i>                     | 5 (50.0%)                    |
| <i>Methotrexate, n (%)</i>                     | 8 (80.0%)                    |
| <i>Leflunomide, n (%)</i>                      | 1 (10.0%)                    |
| <i>Tacrolimus, n (%)</i>                       | 3 (30.0%)                    |
| <i>Hydroxychloroquine or Quinacrine, n (%)</i> | 5 (50.0%)                    |
| <i>Tofacitinib, n (%)</i>                      | 3 (30.0%)                    |
| <i>Cyclophosphamide, n (%)</i>                 | 1 (10.0%)                    |
| <i>Currently on upadacitinib, n</i>            | 9                            |
| <i>As monotherapy, n (%)</i>                   | 3 (33.3%)                    |
| <i>With concurrent treatment, n (%)</i>        | 6 (67.7%)                    |
| <i>Prednisone, n (%)</i>                       | 3 (33.3%)                    |
| <i>IVIg, n (%)</i>                             | 1 (11.1%)                    |

|                                     |                  |
|-------------------------------------|------------------|
| <i>Mycophenolate, n (%)</i>         | <i>2 (22.2%)</i> |
| <i>Methotrexate, n (%)</i>          | <i>3 (44.4%)</i> |
| <i>Adverse events, total, n (%)</i> | <i>1 (10.0%)</i> |
| <i>Acneiform rash, n (%)</i>        | <i>1 (10.0%)</i> |
